# Supplementary material
Source: PubMed Central journal article supplement (PMC380966)
Supplement: 7600069s1.pdf [file 7600069s1.pdf]

## Integration of TGF- $\beta$ and Jagged1/Notch Signalling in Epithelial-to-Mesenchymal Transition

Jiri Zavadil, Lukas Cermak, Noemi Soto-Nieves & Erwin P. Böttinger

Departments of Medicine and Molecular Genetics, Albert Einstein College of Medicine, 1300 Morris Park Avenue, Bronx, New York 10461, U.S.A

### Supplementary Figure S1

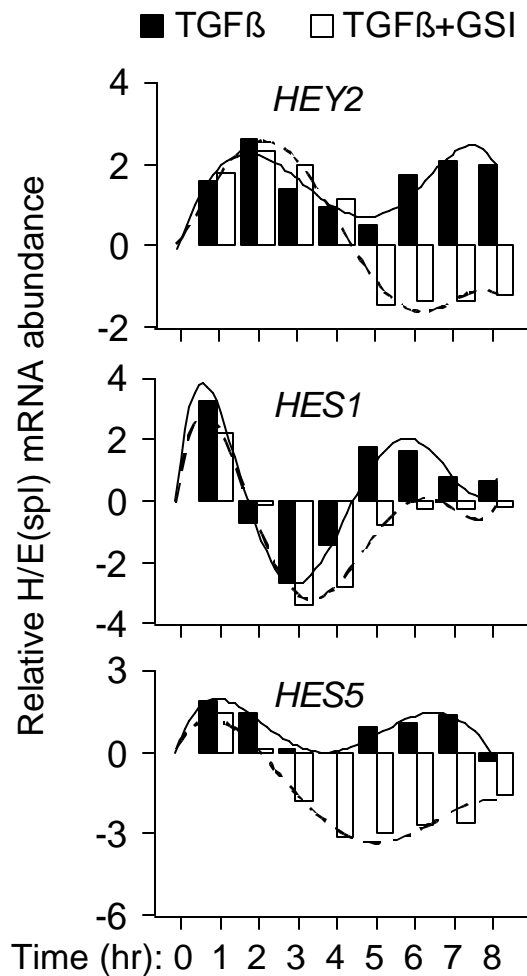

**Fig. S1** H/E(spl) repressors *HEY2*, *HES1* and *HES5* are targets of coordinated signalling by TGF- $\beta$  /Smad and Notch. Bar graphs show averages of relative H/E(spl) mRNA abundance (log<sub>2</sub> transformed), determined by quantitative real-time PCR analysis (N=3) in HaCaT keratinocytes treated with TGF- $\beta$  in the absence (black bars, solid line) or presence (open bars, broken line) of  $\gamma$ -secretase inhibitor (GSI).
